# Supplementary material for: Early Driving Pressure Changes Predict Outcomes during Venovenous Extracorporeal Membrane Oxygenation for Acute Respiratory Distress Syndrome
Source: Hindawi journal article supplement (doi:10.1155/2020/6958152), 2020-03-09

■ Non-survivors

■ Survivors

Supplement 1

A

RV fractional area change [%]

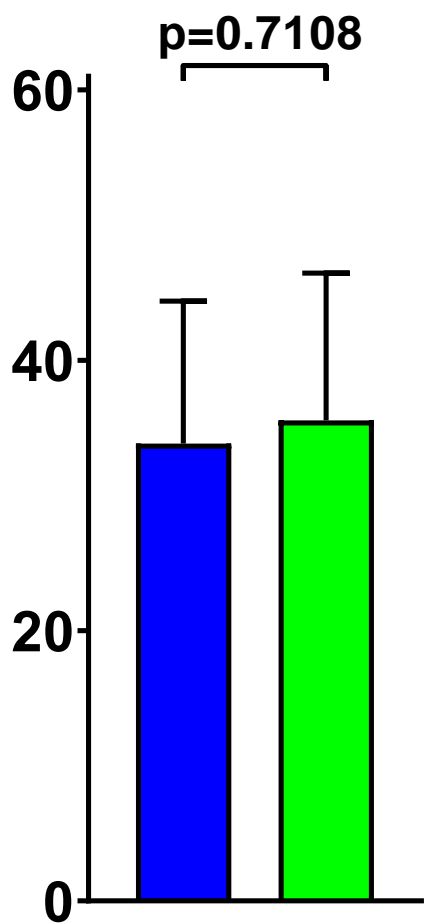

B

LV enddiastolic Volume [ml]

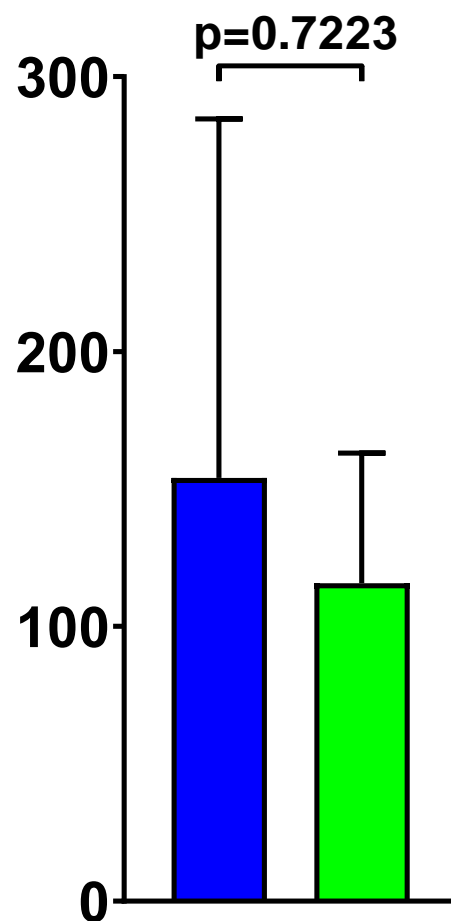

C

LV ejection fraction [%]

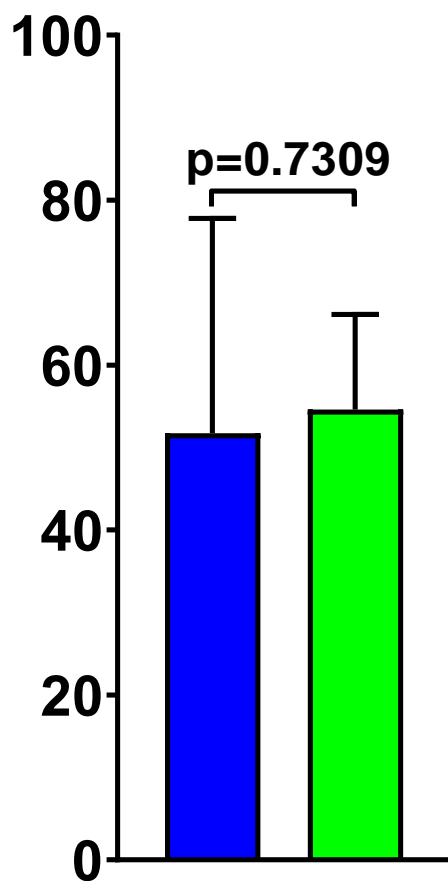

Supplement: f1 [file 6958152.f1.pdf]
